# Supplementary material
Source: JCI journal article supplement (doi:10.1172/jci192285)

Figure S1. ATR senses ECM stiffness through USP21

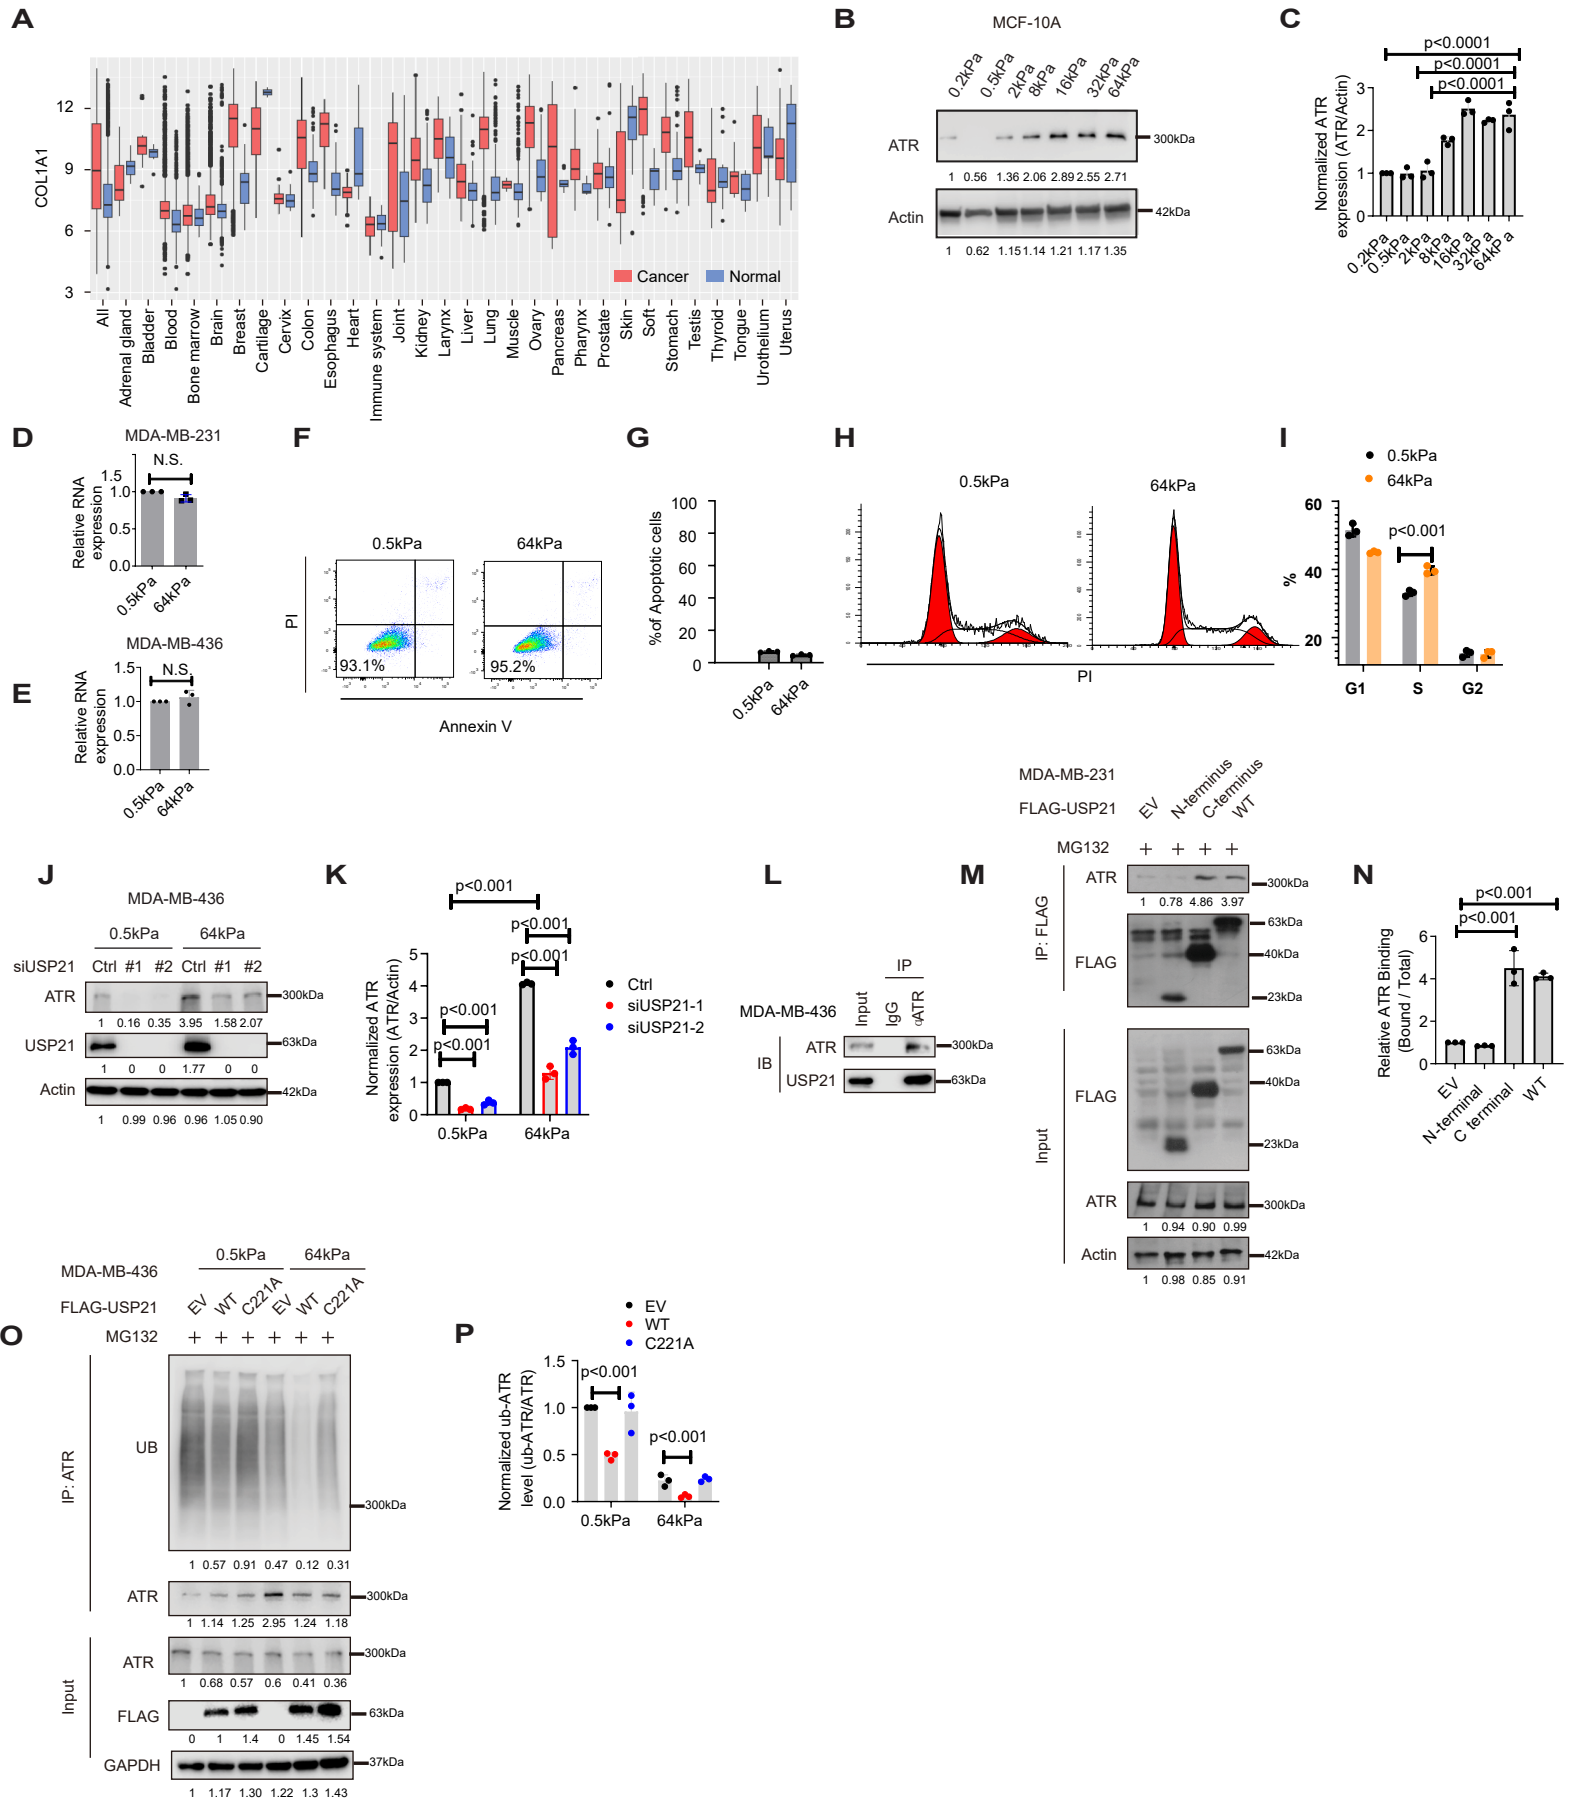

Figure S2. ATR promotes tumor invasion and metastasis

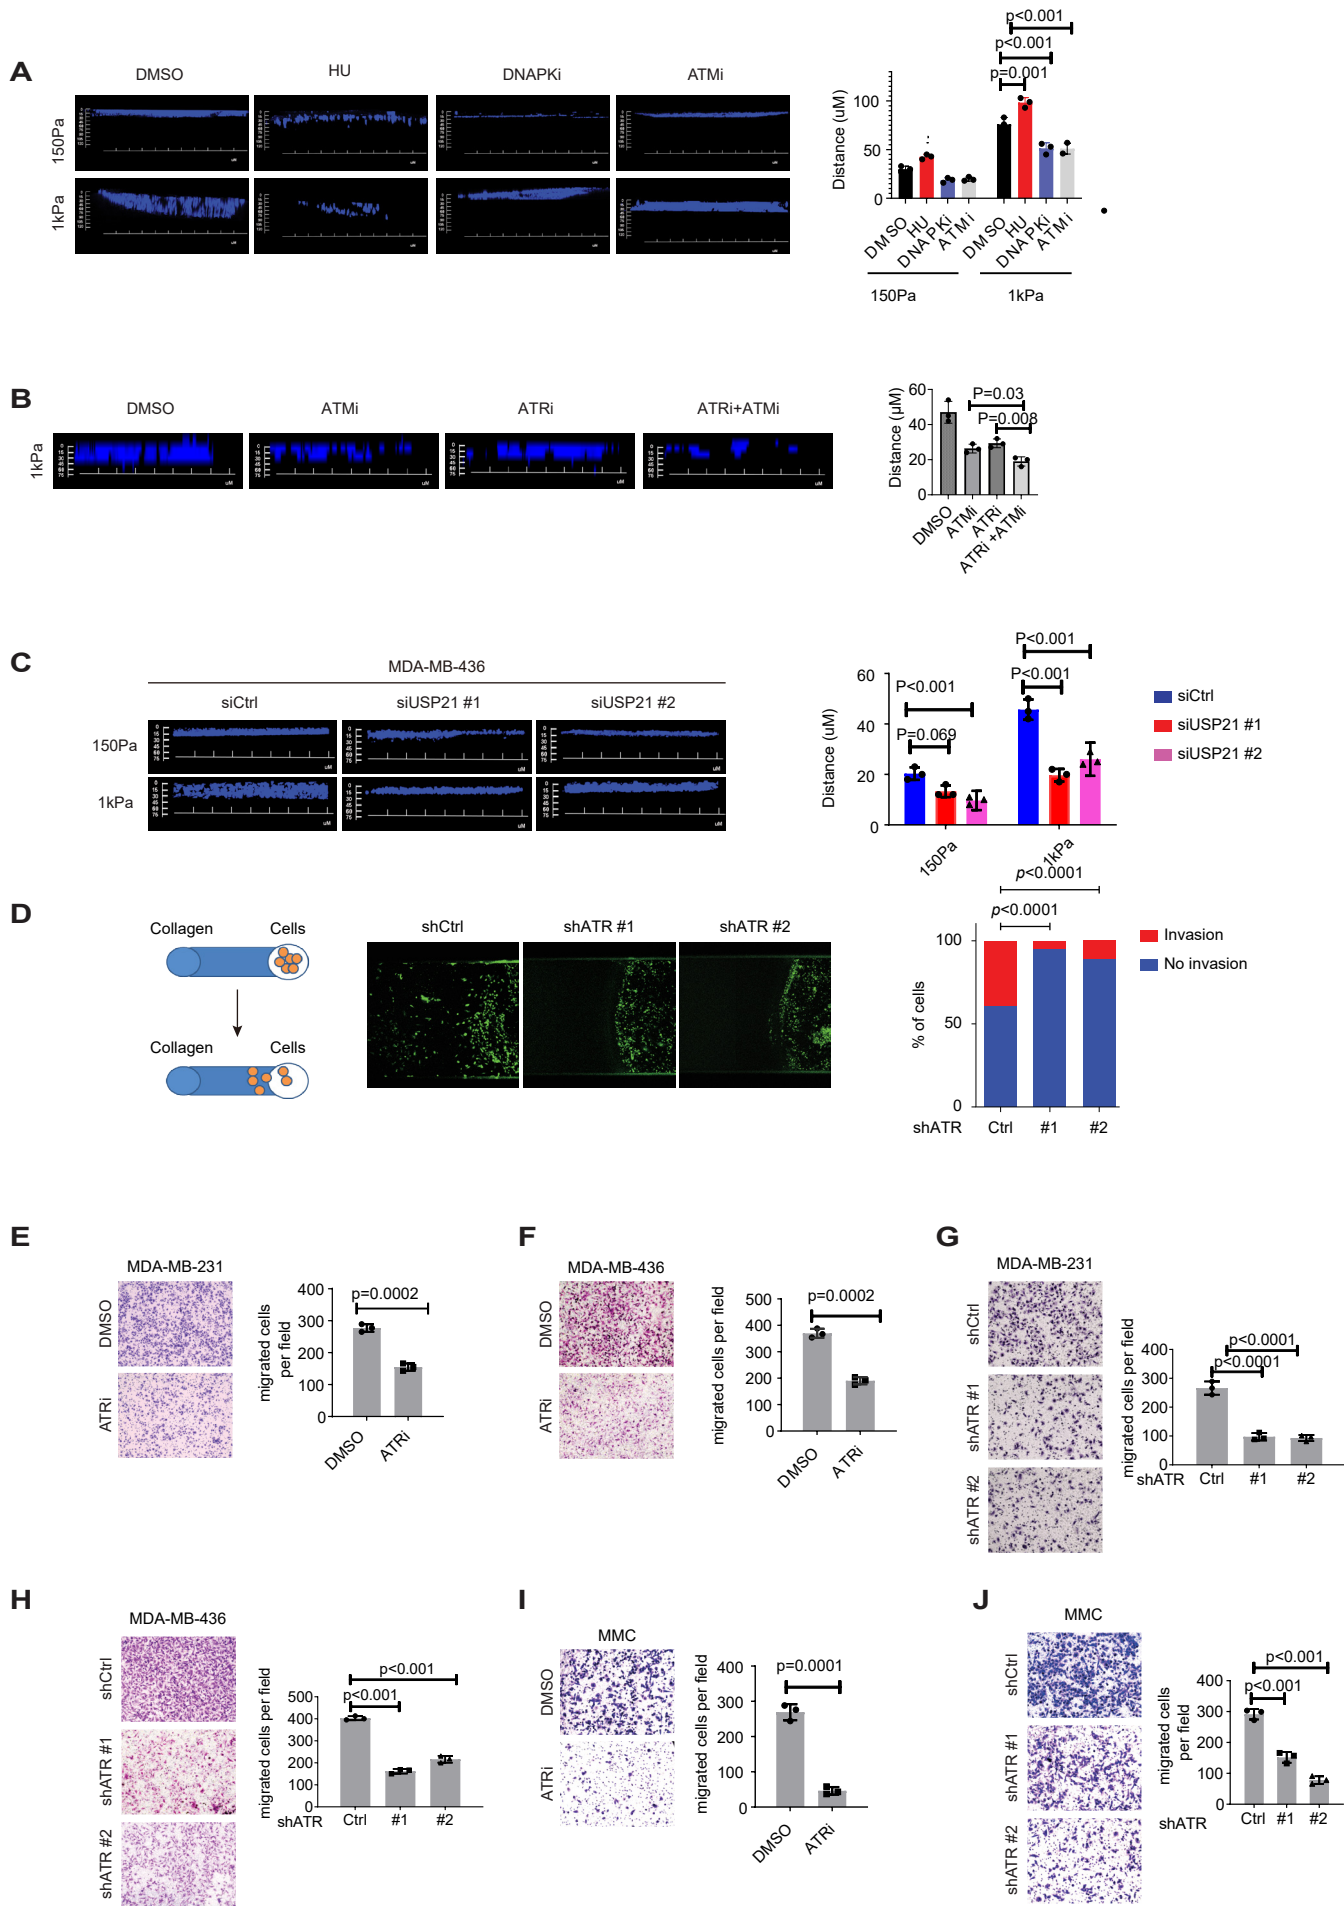

Figure S3. ATR Facilitates cytoskeleton remodeling induced EMT Process

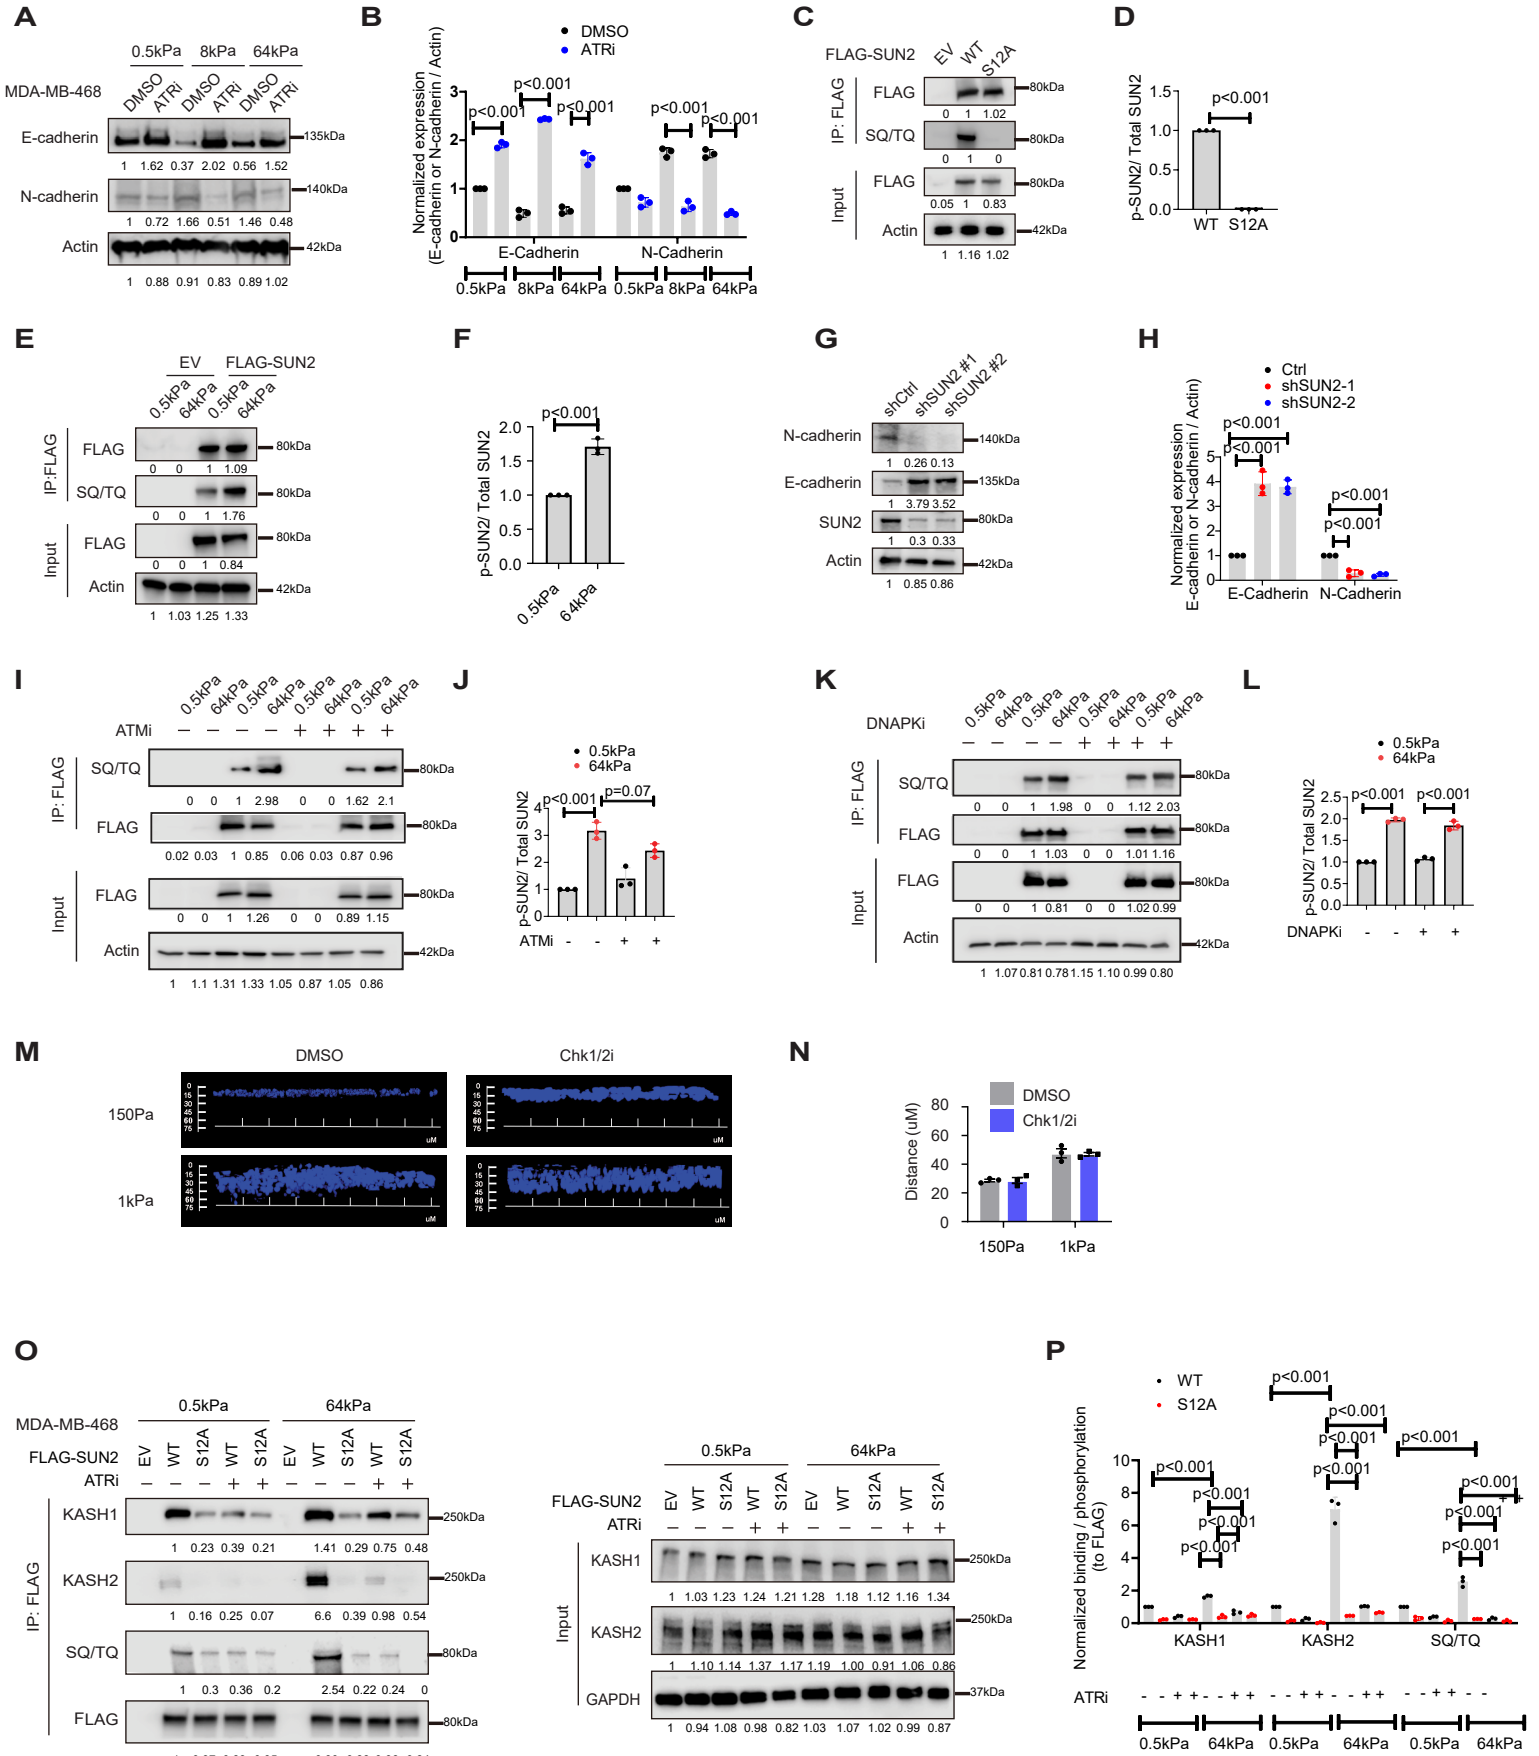

FigureS4. ATR inhibition suppresses ECM stiffness induced EMT through SUN2

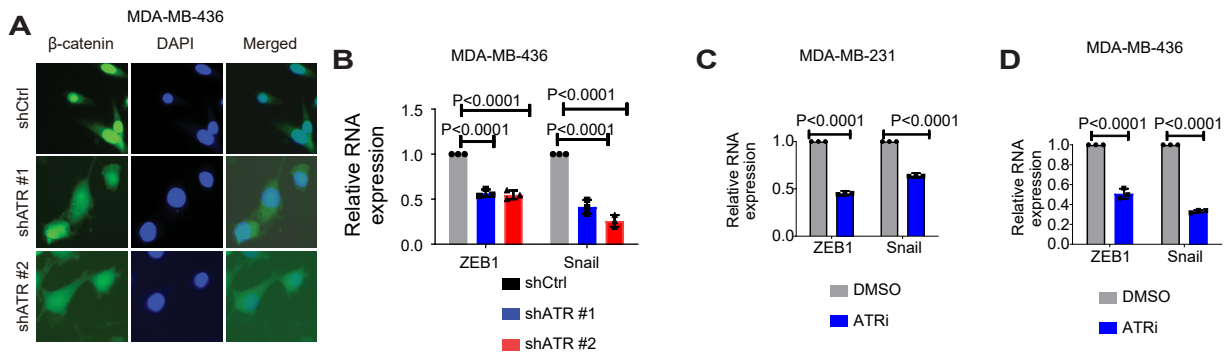

Figure S5. ATR inhibition activate anti-tumor immunity

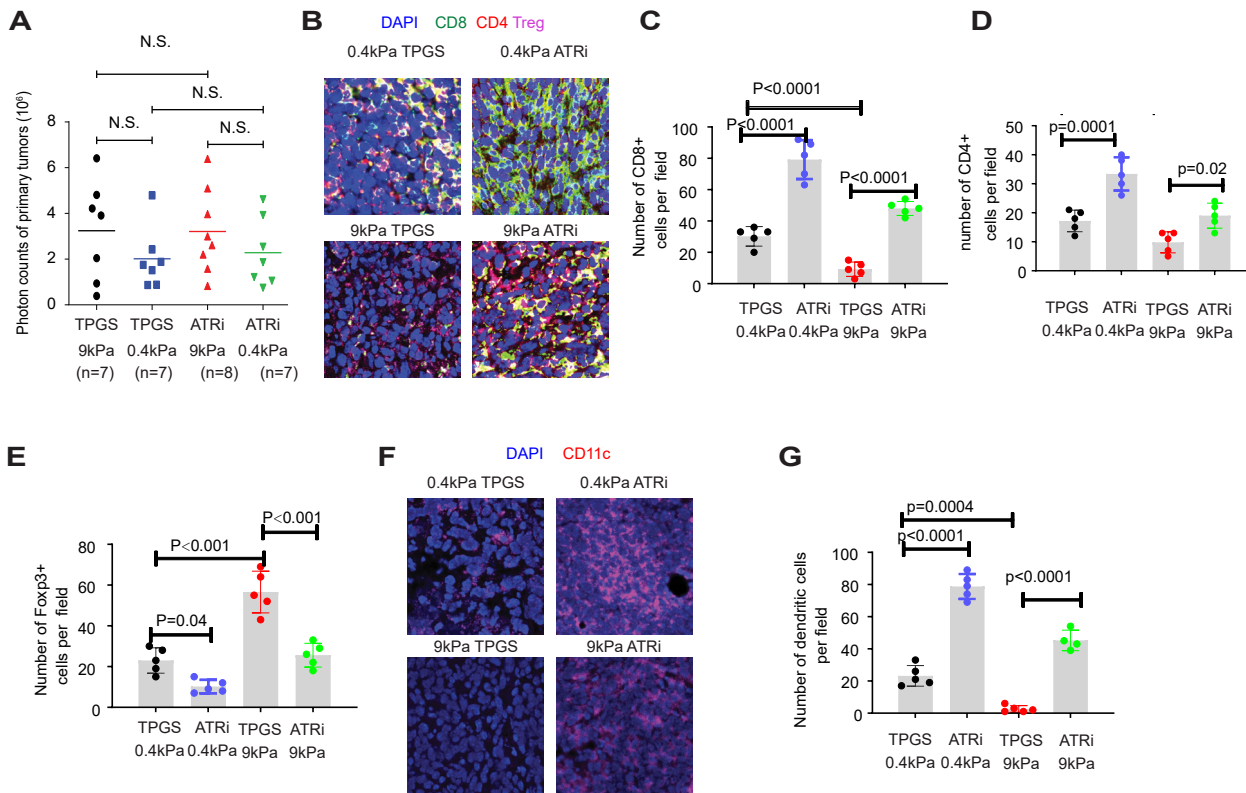

Figure S6. ATR inhibition sensitizes tumors to immunotherapy

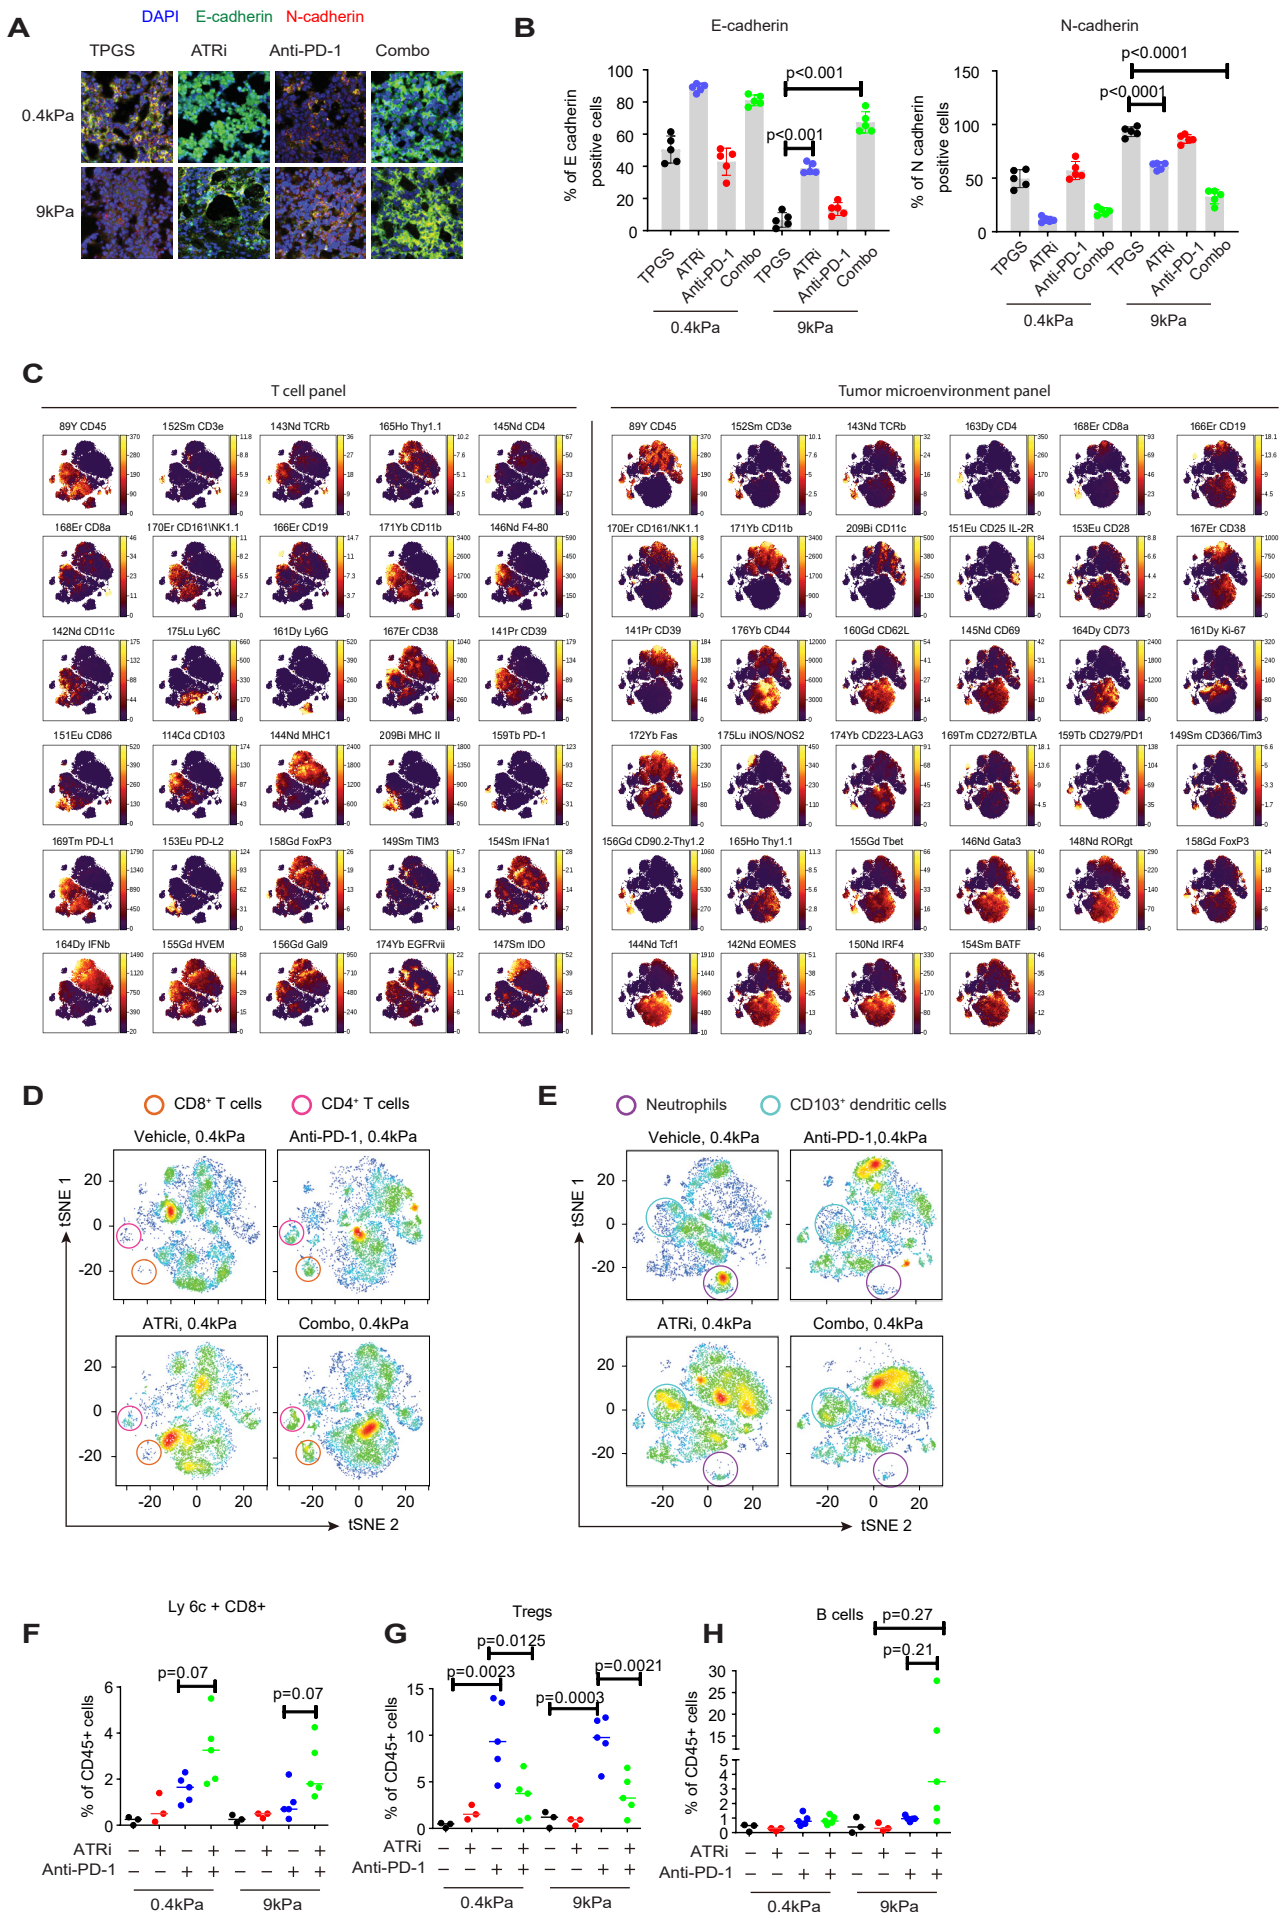

Supplement: sd2 [file 2]
